# Supplementary material for: Decoding the relationship between the electrocaloric strength and phase structure in perovskite ferroelectrics towards high performance
Source: Royal Society of Chemistry journal article supplement (doi:10.1039/d0tc04531d), 2020-11-17
Supplement: d0tc04531d1.pdf [file d0tc04531d1.pdf]

Supporting Information  
for

Decoding the relationships between electrocaloric strength and phase structure  
in perovskite ferroelectrics towards high performance

Xiaowei Wei, Chunlin Zhao, Ting Zheng and Jiagang Wu\*

Department of Materials Science, Sichuan University, 610065, China

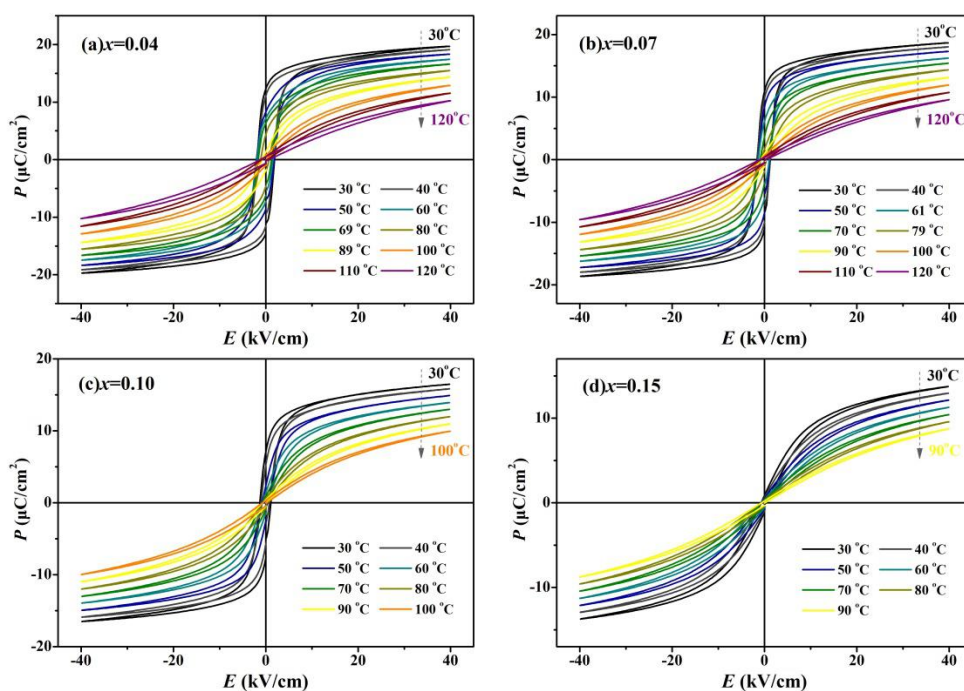

Fig. S1 Temperature-dependent ferroelectric hysteresis ( $P$ - $E$ ) loops for BT- $x$ CZ-BS ceramics with (a)  $x=0.04$ , (b)  $x=0.07$ , (c)  $x=0.10$ , and (d)  $x=0.15$  measured at 1 Hz from 30 °C to 90-120 °C.

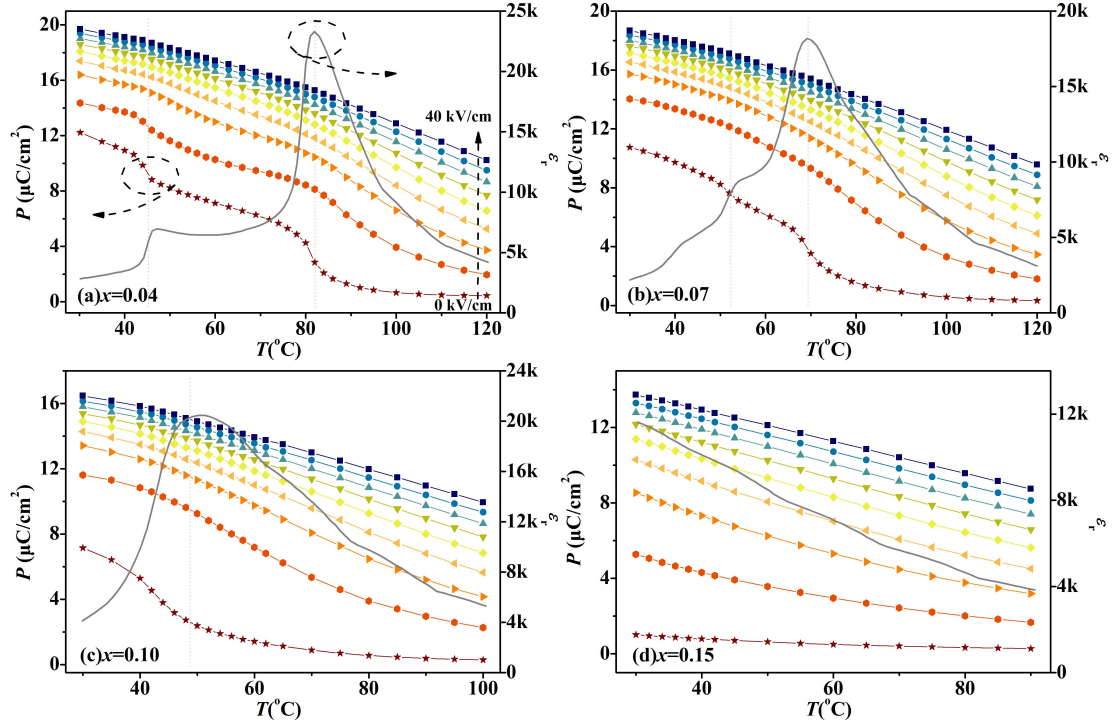

Fig. S2 Temperature-dependent polarization evolution (extracted from the maximum polarization in  $P$ - $E$  loops) under different electric field from 0 to 40 kV/cm for BT- $x$ CZ-BS ceramics with (a)  $x=0.04$ , (b)  $x=0.07$ , (c)  $x=0.10$ , and (d)  $x=0.15$ . The polarization at 0 kV/cm was obtained from the remnant polarization in each  $P$ - $E$  loops under 25 kV/cm.

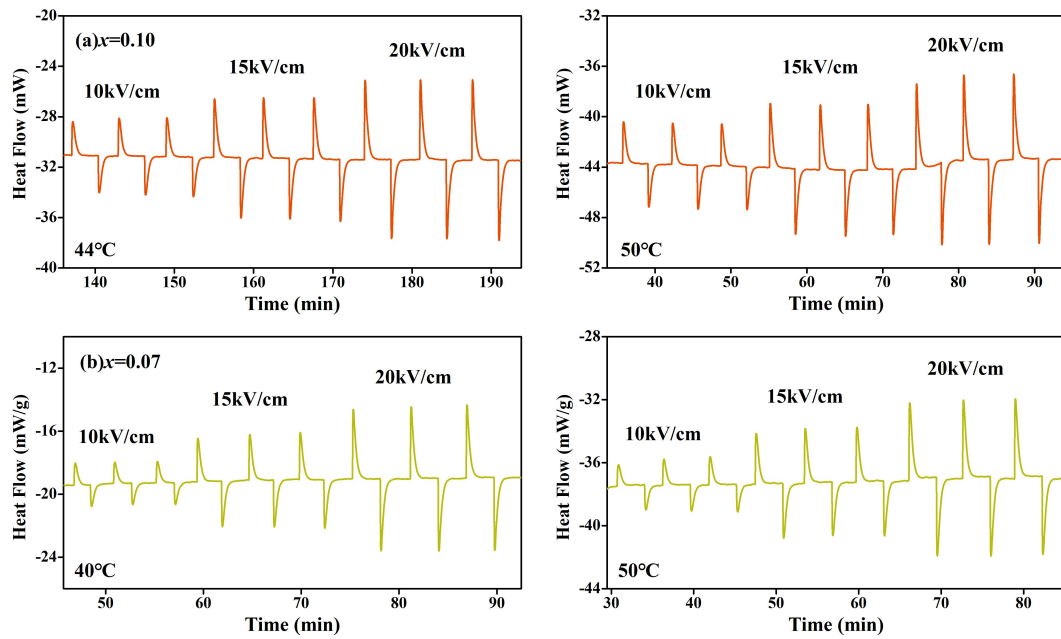

Fig. S3 the DSC heat flow measurement results at various temperature and electric field for BT- $x$ CZ-BS ceramics with (a)  $x=0.10$ , (b)  $x=0.07$ .
